# Supplementary material
Source: PubMed Central journal article supplement (PMC2946797)
Supplement: NIHMS229256-supplement-01.pdf [file NIHMS229256-supplement-01.pdf]

## SUPPLEMENTAL MATERIAL

## CLINICAL SUMMARY

With the exception of fish, few major dietary protein sources have been studied in relation to the development of coronary heart disease (CHD). Our objective was to examine the relation between foods which are major dietary protein sources and incident CHD. We prospectively followed 84,136 women aged 30-55 years in the Nurses' Health Study with no known cancer, diabetes, angina, myocardial infarction, stroke, or other cardiovascular disease. During 26 years of follow-up, we documented 2210 incident nonfatal infarctions and 952 deaths from CHD. In multivariate analyses including age, smoking, and other known cardiovascular risk factors, a higher intake of red meat was significantly associated with an elevated risk of CHD. Higher intakes of poultry, fish, and nuts were significantly associated with lower risk. In a model controlling statistically for total energy intake, one serving/day of nuts was associated with a 30% (95% CI: 17% to 42%) lower risk of CHD, when compared to one serving/day of red meat. Similarly, when compared to one serving/day of red meat, one serving/day of low-fat dairy was associated with a 13% (95% CI: 6% to 19%) lower risk, one serving/day of poultry was associated with a 19% (95% CI: 3% to 33%) lower risk, and one serving/day of fish was associated with a 24% (95% CI: 6% to 39%) lower risk. These data suggest that high red meat intake increases risk of CHD, and that risk of CHD may be reduced importantly by shifting the sources of protein in the U.S. diet.

Type of file: table

Label:

Filename: SUPPLEMENTAL\_MATERIAL\_(Appendix\_Table).pdf

**SUPPLEMENTAL MATERIAL**

**Appendix Table: Serving Sizes of Major Protein Sources on Food Frequency Questionnaires  
in the Nurses' Health Study, 1980-2002**

|                                          | <b>1980</b>       | <b>1984</b>           | <b>1986</b>           | <b>1990</b>           | <b>1994</b>           | <b>1998</b>           | <b>2002</b>           |
|------------------------------------------|-------------------|-----------------------|-----------------------|-----------------------|-----------------------|-----------------------|-----------------------|
| <b>Milk (incl. skim, 1%, 2%, whole)</b>  | 8oz               | 8oz                   | 8oz                   | 8oz                   | 8oz                   | 8oz                   | 8oz                   |
| <b>Cream</b>                             |                   | 1 tbs                 |
| <b>Sour cream</b>                        |                   | 1 tbs                 |
| <b>Yogurt (incl. flavored and plain)</b> | 1 cup             | 1 cup                 | 1 cup                 | 1 cup                 | 1 cup                 | 1 cup                 | 1 cup                 |
| <b>Ice cream</b>                         | ½ cup             | ½ cup                 | ½ cup                 | ½ cup                 | ½ cup                 | ½ cup                 | ½ cup                 |
| <b>Cottage or ricotta cheese</b>         | ½ cup             | ½ cup                 | ½ cup                 | ½ cup                 | ½ cup                 | ½ cup                 | ½ cup                 |
| <b>Hard cheese</b>                       | 1 slice or<br>svg | 1 slice or<br>1oz svg |
| <b>Cream cheese</b>                      |                   | 1 oz                  |
| <b>Butter</b>                            | 1 pat             | 1 pat                 | 1 pat                 | 1 pat                 | 1 pat                 | 1 pat                 | 1 pat                 |
| <b>Chicken w/o skin</b>                  | 6-8oz             | 4-6oz                 | 4-6oz                 | 4-6oz                 | 4-6oz                 | 3oz                   | 3oz                   |
| <b>Chicken w/skin</b>                    | 6-8oz             | 4-6oz                 | 4-6oz                 | 4-6oz                 | 4-6oz                 | 3oz                   | 3oz                   |

|                                                                                                        |                     |                     |                     |                     |                               |                               |                               |
|--------------------------------------------------------------------------------------------------------|---------------------|---------------------|---------------------|---------------------|-------------------------------|-------------------------------|-------------------------------|
| <b>Hamburger<br/>(incl.<br/>regular and<br/>lean)</b>                                                  | 1 patty                       | 1 patty                       | 1 patty                       |
| <b>Hot dog</b>                                                                                         | 1 hot dog                     | 1 hot dog                     | 1 hot dog                     |
| <b>Chicken or<br/>turkey dog</b>                                                                       |                     |                     |                     |                     | 1 chicken<br>or turkey<br>dog | 1 chicken<br>or turkey<br>dog | 1 chicken<br>or turkey<br>dog |
| <b>Processed<br/>meats<br/>* Sandwich<br/><br/>* Other<br/>(sausage,<br/>kielbasa, et)</b>             | 1 piece or<br>slice           | 1<br>sandwich<br><br>2oz      | 1<br>sandwich<br><br>2oz      |
| <b>Bacon</b>                                                                                           | 2 slices                      | 2 slices                      | 2 slices                      |
| <b>Beef, pork,<br/>lamb<br/>sandwich or<br/>mixed dish<br/>(stew,<br/>casserole,<br/>lasagna, etc)</b> | Not<br>quantified   | Not<br>quantified   | Not<br>quantified   | Not<br>quantified   | Not<br>quantified             | Not<br>quantified             | Not<br>quantified             |
| <b>Beef, pork,<br/>lamb as<br/>main dish<br/>(steak,<br/>roast, ham,</b>                               | 6-8oz               | 4-6oz               | 4-6oz               | 4-6oz               | 4-6oz                         | 4-6oz                         | 4-6oz                         |

|                                                                    |       |       |       |       |       |       |       |
|--------------------------------------------------------------------|-------|-------|-------|-------|-------|-------|-------|
| etc.)                                                              |       |       |       |       |       |       |       |
| <b>Pork as a main dish (eg, ham or chops)</b>                      |       |       |       |       | 4-6oz | 4-6oz | 4-6oz |
| <b>Beef as a main dish (eg, steak or roast)</b>                    |       |       |       |       | 4-6oz | 4-6oz | 4-6oz |
| <b>Liver</b>                                                       |       | 3-4oz |       |       |       |       |       |
| * Beef                                                             |       |       | 4oz   | 4oz   | 4oz   | 4oz   | 4oz   |
| * Chicken                                                          |       |       | 1oz   | 1oz   | 1oz   | 1oz   | 1oz   |
| <b>Eggs</b>                                                        | 1 egg |
| <b>Fish</b>                                                        | 6-8oz |       |       |       |       |       |       |
| * Canned tuna                                                      |       | 3-4oz | 3-4oz | 3-4oz | 3-4oz | 2-3oz | 2-3oz |
| * Dark meat fish (mackerel, salmon, sardines, bluefish, swordfish) |       | 3-5oz | 3-5oz | 3-5oz | 3-5oz | 3-5oz | 3-5oz |
| * Other fish (eg, Cod, Haddock, Halibut)                           |       | 3-5oz | 3-5oz | 3-5oz | 3-5oz | 3-5oz | 3-5oz |

|                                                     |       |                     |                     |                     |                     |                     |                     |
|-----------------------------------------------------|-------|---------------------|---------------------|---------------------|---------------------|---------------------|---------------------|
| <b>* Breaded fish cakes, pieces, or fish sticks</b> |       |                     |                     |                     | 1 svg               | 1 svg               | 1 svg               |
| <b>Nuts (incl. peanuts, walnuts, other nuts)</b>    | 1oz   | Small packet or 1oz | Small packet or 1oz | Small packet or 1oz | Small packet or 1oz | Small packet or 1oz | Small packet or 1oz |
| <b>Beans or lentils, baked or dry</b>               | ½ cup | ½ cup               | ½ cup               | ½ cup               | ½ cup               | ½ cup               | ½ cup               |
